# Supplementary material for: Synergistic application of Bacillus subtilis IAGS174 and thiamine to mitigate salinity and lead stress in Helianthus annuus
Source: PeerJ. 2025 Jun 9;13:e19527. doi: 10.7717/peerj.19527 (PMC12161140; doi:10.7717/peerj.19527)
Supplement: Supplemental Information 1 [file peerj-13-19527-s001.xlsx]

## Sheet: Sheet1
Treatments	Replicates	RL	SL	SFW	SDW	RFW	RDW	Chl. a	Chl. b	Total. Chl.	Carotenoids	Phenol	Flavonoids	SOD	CAT	POD	MDA	H2O2	Na root	Na Shoot	Pb root	Pb shoot
Control	R1	10.9	64	11.9	3.19	1.85	0.64	2.73	1.37	4.13	1.14	37.2	13.3	4.75	39	1.84	20.1	27.3	1.71	1.75	ND	ND
Control	R2	9.3	62	10.2	3.15	1.79	0.6	2.89	1.89	6.17	1.73	39.3	12.95	4.68	36	1.75	19.1	26.19	1.51	1.84	ND	ND
Control	R3	7.1	60	8.5	3.11	1.7	0.59	2.66	0.79	2.06	0.58	35.1	10.65	4.61	30	1.6	17.2	23.91	1.31	1.57	ND	ND
Control+Bacteria	R1	10.2	67	13	3.51	1.84	0.69	3.29	1.53	2.68	0.82	47.35	14.86	7.19	46	2.12	16.09	21.77	1.39	1.66	ND	ND
Control+Bacteria	R2	12.3	68	14.5	3.53	1.93	0.71	3.48	1.78	5.25	1.64	44.4	14.23	6.95	37	1.97	17.5	24.1	1.79	2.08	ND	ND
Control+Bacteria	R3	14.1	69	16	3.55	1.99	0.73	3.67	2.15	7.97	2.46	41.75	13.21	6.74	34	1.73	18.31	24.93	1.89	1.93	ND	ND
Contro+Thiamine	R1	10.8	63	11.8	3.41	1.82	0.58	3.3	1.72	5.05	1.52	43.7	13.4	5.92	41	2.05	18.47	25.79	1.68	1.55	ND	ND
Contro+Thiamine	R2	12.4	67	14.6	3.45	1.89	0.71	3.08	0.87	2.53	0.77	39.8	12.53	5.84	32	1.61	16.23	22.78	1.58	1.83	ND	ND
Contro+Thiamine	R3	11.3	65	12.9	3.43	1.87	0.66	3.49	2.6	7.57	2.3	44.6	14.27	5.7	38	1.8	17.8	24.93	1.18	1.21	ND	ND
Control+Bacteria+Thiamine	R1	12.8	69	13.9	4.33	1.95	0.71	3.95	2.68	8.53	2.5	46.1	15.2	7.25	42	1.94	14.9	21.38	1.94	1.93	ND	ND
Control+Bacteria+Thiamine	R2	13.3	72	15.9	4.35	1.97	0.79	3.55	1.15	2.87	1.1	48.8	15.95	7.04	45	2.09	17.5	24.16	1.35	1.39	ND	ND
Control+Bacteria+Thiamine	R3	14.1	75	16.1	4.4	1.99	0.84	3.75	1.93	5.67	1.77	43.4	14.45	7.1	36	1.88	16.5	23.16	1.57	1.81	ND	ND
Salinity	R1	5.7	49	9.3	2.77	1.39	0.63	3.14	1.36	4.73	1.25	55.4	17.9	16	52	5.63	28.2	31.5	54	70	ND	ND
Salinity	R2	5.1	45	7.3	2.73	1.29	0.39	1.12	0.49	1.47	0.55	57.4	18.97	19	56	5.74	29.4	33.05	40	55	ND	ND
Salinity	R3	5.4	47	8.9	2.75	1.34	0.51	2.16	0.91	3.07	0.93	51.6	16.83	10	45	5.58	25.8	29.05	29	46	ND	ND
Salinity+Bacteria	R1	8.4	57	8.8	2.86	1.43	0.53	2.65	0.98	4	1.02	68.6	23.7	19.61	65	7.3	22.1	22.07	47	74	ND	ND
Salinity+Bacteria	R2	8.8	63	9.4	2.91	1.5	0.62	3.92	1.9	6	1.7	63.4	21.8	18.48	58	7.24	23.8	23.9	55	77	ND	ND
Salinity+Bacteria	R3	8.6	60	9.1	2.87	1.48	0.56	1.29	0.06	1.4	0.64	70.8	24.7	20.83	69	7.42	25.2	25.13	51	68	ND	ND
Salinity+Thiamine	R1	6.9	54	8.81	2.78	1.36	0.51	3.95	1.37	4.88	1.57	63.4	21.7	17.73	68	6.85	25.9	26.82	28	39	ND	ND
Salinity+Thiamine	R2	7.1	55	8.89	2.85	1.42	0.54	2.59	0.95	3.49	1.09	66.7	22.7	16.82	73	6.91	24.5	25.74	35	44	ND	ND
Salinity+Thiamine	R3	7.6	59	9	2.92	1.45	0.57	1.14	0.47	2.1	0.49	59.5	20.1	18.91	60	6.73	22.5	23.64	24	31	ND	ND
Salinity+Bacteria+Thiamine	R1	9.1	60	10.3	2.85	1.48	0.5	2.71	1.07	3.69	1.26	75.2	26.5	22.57	26.5	8.32	21.9	18.5	43	58	ND	ND
Salinity+Bacteria+Thiamine	R2	9.8	66	10.69	2.96	1.55	0.67	1.36	1.02	2.28	0.42	72.5	25.6	18.45	25.6	8.15	22.9	19.22	52	70	ND	ND
Salinity+Bacteria+Thiamine	R3	9.3	63	10.51	2.89	1.5	0.6	4.06	1.09	5.4	1.86	66.8	23.5	20.69	23.5	7.89	20	16.88	49	67	ND	ND
Pb	R1	4.5	42	8.35	2.32	1.15	0.45	1.91	0.74	2.68	0.83	62.6	21.22	29	75	8.06	34.6	40.25	0.96	0.82	90	156
Pb	R2	4.2	39	8.15	2.32	1.13	0.43	2.03	1.13	4.02	1.24	59.8	20.3	20	64	7.79	31.8	38.81	1.05	1.24	96	161
Pb	R3	3.6	36	7.8	2.29	1.11	0.41	1.82	0.38	1.34	0.42	57	19.38	23	68	7.94	29.9	35.81	0.54	0.73	87	154
Pb+Bacteria	R1	8.8	57	9.44	2.47	1.28	0.47	2.27	0.85	3.14	0.94	78.1	29.4	40	87	12.73	27.9	25.62	1.33	1.22	124	219
Pb+Bacteria	R2	7.76	52	9.04	2.43	1.22	0.45	2.18	0.39	1.59	0.49	70.7	25.2	28	76	10.95	26.3	24.79	1.02	1.16	120	215
Pb+Bacteria	R3	8.34	53	9.12	2.45	1.25	0.46	2.39	1.28	4.72	1.42	75.9	27	34	80	11.81	24.4	22.49	0.71	1.04	113	211
Pb+Thiamine	R1	6.7	48	8.7	2.39	1.16	0.45	2.25	0.79	3.07	0.85	69.3	23.2	28	77	10.24	28.8	29.8	0.78	0.84	73	115
Pb+Thiamine	R2	7.3	53	8.89	2.41	1.27	0.47	3.13	1.25	4.63	1.35	66.4	22.2	24	70	9.81	31.1	31.48	1.1	0.91	78	118
Pb+Thiamine	R3	6.4	46	8.51	2.37	1.2	0.43	1.31	0.39	1.51	0.41	73.1	24.8	35	81	10.58	27.4	27.52	0.49	0.71	71	106
Pb+Bacteria+Thiamine	R1	9.7	61	9.49	2.53	1.4	0.52	3.28	1.33	4.96	1.55	82.9	31	35	92	12.88	22.9	20.36	0.78	0.55	103	186
Pb+Bacteria+Thiamine	R2	8.05	55	9.11	2.52	1.35	0.46	2.38	0.87	3.35	1.04	77.3	29.9	42	86	12.71	24.6	22.1	1.03	1.42	115	197
Pb+Bacteria+Thiamine	R3	8.95	58	9.3	2.54	1.39	0.49	1.42	0.47	1.62	0.35	74.7	27.9	31	83	12.45	26	22.94	0.92	0.97	106	190
Pb+Salt	R1	3.9	39	7.4	2.17	0.95	0.34	1.53	0.61	2.15	0.53	64.6	24.5	25	104	8.15	43.9	54.7	43	56	88	148
Pb+Salt	R2	3.5	30	7.3	2.15	0.92	0.31	2.28	0.9	3.13	1.05	68.5	26.4	30	113	8.6	44.8	56.78	37	52	84	137
Pb+Salt	R3	3.1	27	7.2	2.13	0.89	0.28	0.78	0.32	1.23	0.31	72.4	28	38	119	9.2	40	50.22	31	45	77	132
Pb+Salt+Bacteria	R1	5.3	40	7.81	2.28	0.94	0.39	2.76	1.03	3.43	1.11	85.2	35.9	55	157	12.71	37.72	41	45	65	102	176
Pb+Salt+Bacteria	R2	4.9	34	7.11	2.17	0.91	0.32	0.72	0.42	1.4	0.28	90.2	37.9	48	149	13.11	36	38.1	43	58	98	166
Pb+Salt+Bacteria	R3	5.7	43	7.88	2.39	1.09	0.43	1.59	0.56	2.34	0.65	80.2	33.3	41	138	12.46	33.08	35.8	35	54	88	162
Pb+Salt+Thiamine	R1	4.4	32	7.1	2.29	0.91	0.33	1.64	0.66	2.41	0.75	79.2	32.6	44	135	11.87	36.87	43.9	22	28	67	105
Pb+Salt+Thiamine	R2	4.7	35	7.3	2.33	0.98	0.35	2.56	0.96	3.46	0.98	74.3	30.5	32	129	11.57	32.33	37.8	34	35	76	115
Pb+Salt+Thiamine	R3	5	44	7.5	2.34	0.99	0.4	0.72	0.33	1.06	0.22	83.8	34.7	50	141	12.02	35.2	41.9	25	33	70	107
Pb+Salt+bacteria+Thiamine	R1	5.3	36	7.79	2.35	0.83	0.38	1.78	0.71	2.51	0.72	95.75	38.3	55	156	15.3	33.35	34.46	38	49	95	155
Pb+Salt+bacteria+Thiamine	R2	5.9	45	7.9	2.36	1.28	0.44	0.89	0.37	1.26	0.36	88.65	36.1	49	145	13.37	31.8	33.21	45	53	102	164
Pb+Salt+bacteria+Thiamine	R3	5.6	42	7.71	2.34	1.1	0.41	2.67	1.05	3.76	1.08	99.7	40.5	52	152	14.17	29.35	29.83	34	42	79	155
